# Supplementary material
Source: Research Square preprint supplement (doi:10.21203/rs.3.rs-10062612/v1)
Supplement: Supplementary file 1 [file f4ac5f0fe8456e2fe0d49159.docx]

**Appendix**

**Table A1**

*Sociodemographic Characteristics of Climate Change Harm Perception, HINTS 7 (2024)*

| Characteristic | *Yes (Believes climate change will harm health)* | *No (Does not believe)* | *Row Total (N)* | *χ² (df)* | *p* |
| --- | --- | --- | --- | --- | --- |
| *Sex* |  |  |  | 95.20 (1) | < .001 |
| Female | 2,373 (82.3%) | 511 (17.7%) | 2,884 |  |  |
| Male | 1,420 (70.4%) | 596 (29.6%) | 2,016 |  |  |
| *Age group* |  |  |  | 70.42 (4) | < .001 |
| 18–34 | 747 (84.1%) | 141 (15.9%) | 888 |  |  |
| 35–49 | 900 (81.5%) | 204 (18.5%) | 1,104 |  |  |
| 50–64 | 982 (76.5%) | 301 (23.5%) | 1,283 |  |  |
| 65–74 | 738 (73.5%) | 266 (26.5%) | 1,004 |  |  |
| 75+ | 426 (68.6%) | 195 (31.4%) | 621 |  |  |
| *Race/Ethnicity* |  |  |  | 100.48 (4) | < .001 |
| Non-Hispanic White | 2,001 (72.3%) | 768 (27.7%) | 2,769 |  |  |
| Hispanic | 797 (82.6%) | 168 (17.4%) | 965 |  |  |
| Non-Hispanic Black | 593 (85.9%) | 97 (14.1%) | 690 |  |  |
| Non-Hispanic Asian | 242 (86.4%) | 38 (13.6%) | 280 |  |  |
| Non-Hispanic Other | 160 (81.6%) | 36 (18.4%) | 196 |  |  |
| *Education* |  |  |  | 19.55 (4) | < .001 |
| Less than high school | 203 (80.2%) | 50 (19.8%) | 253 |  |  |
| High school graduate | 540 (75.9%) | 171 (24.1%) | 711 |  |  |
| Some college | 1,034 (74.5%) | 354 (25.5%) | 1,388 |  |  |
| Bachelor’s degree | 1,115 (77.3%) | 328 (22.7%) | 1,443 |  |  |
| Postgraduate degree | 901 (81.5%) | 204 (18.5%) | 1,105 |  |  |
| *Income* |  |  |  | 8.85 (6) | .182 |
| Less than $20,000 | 586 (80.1%) | 146 (19.9%) | 732 |  |  |
| $20,000 to <$35,000 | 444 (78.3%) | 123 (21.7%) | 567 |  |  |
| $35,000 to <$50,000 | 457 (77.5%) | 133 (22.5%) | 590 |  |  |
| $50,000 to <$75,000 | 622 (75.2%) | 205 (24.8%) | 827 |  |  |
| $75,000 to <$100,000 | 512 (79.5%) | 132 (20.5%) | 644 |  |  |
| $100,000 to <$200,000 | 825 (76.5%) | 254 (23.5%) | 1,079 |  |  |
| $200,000 or more | 347 (75.3%) | 114 (24.7%) | 461 |  |  |
| *Region* |  |  |  | 20.00 (3) | < .001 |
| Northeast | 577 (81.8%) | 128 (18.2%) | 705 |  |  |
| Midwest | 656 (78.5%) | 180 (21.5%) | 836 |  |  |
| South | 1,671 (74.7%) | 566 (25.3%) | 2,237 |  |  |
| West | 889 (79.2%) | 233 (20.8%) | 1,122 |  |  |
| **Total** | 3,793 (77.4%) | 1,107 (22.6%) | 4,900 |  |  |

*Note.* Values represent unweighted cell counts and row percentages. Chi-square statistics test the bivariate association between each characteristic and the binary outcome (perceives climate change will harm health: Yes vs. No).

**Table A2**

*Sociodemographic Characteristics of Climate Change Harm Perception, HINTS 6 (2022)*

| Characteristic | *Yes (Believes climate change will harm health)* | *No (Does not believe)* | *Row Total (N)* | *χ² (df)* | *p* |
| --- | --- | --- | --- | --- | --- |
| *Sex* |  |  |  | 38.93 (1) | < .001 |
| Female | 2,091 (82.6%) | 439 (17.4%) | 2,530 |  |  |
| Male | 1,303 (74.8%) | 439 (25.2%) | 1,742 |  |  |
| *Age group* |  |  |  | 48.99 (4) | < .001 |
| 18–34 | 611 (87.8%) | 85 (12.2%) | 696 |  |  |
| 35–49 | 767 (81.7%) | 172 (18.3%) | 939 |  |  |
| 50–64 | 959 (76.6%) | 293 (23.4%) | 1,252 |  |  |
| 65–74 | 712 (77.4%) | 208 (22.6%) | 920 |  |  |
| 75+ | 345 (74.2%) | 120 (25.8%) | 465 |  |  |
| *Race/Ethnicity* |  |  |  | 55.58 (4) | < .001 |
| Non-Hispanic White | 1,896 (76.2%) | 591 (23.8%) | 2,487 |  |  |
| Hispanic | 624 (84.9%) | 111 (15.1%) | 735 |  |  |
| Non-Hispanic Black | 554 (83.9%) | 106 (16.1%) | 660 |  |  |
| Non-Hispanic Asian | 212 (88.7%) | 27 (11.3%) | 239 |  |  |
| Non-Hispanic Other | 108 (71.5%) | 43 (28.5%) | 151 |  |  |
| *Education* |  |  |  | 15.81 (4) | .003 |
| Less than high school | 150 (76.5%) | 46 (23.5%) | 196 |  |  |
| High school graduate | 519 (76.9%) | 156 (23.1%) | 675 |  |  |
| Some college | 919 (77.2%) | 272 (22.8%) | 1,191 |  |  |
| Bachelor’s degree | 1,037 (80.9%) | 245 (19.1%) | 1,282 |  |  |
| Postgraduate degree | 769 (82.9%) | 159 (17.1%) | 928 |  |  |
| *Income* |  |  |  | 11.00 (6) | .088 |
| Less than $20,000 | 474 (77.2%) | 140 (22.8%) | 614 |  |  |
| $20,000 to <$35,000 | 409 (78.5%) | 112 (21.5%) | 521 |  |  |
| $35,000 to <$50,000 | 446 (81.1%) | 104 (18.9%) | 550 |  |  |
| $50,000 to <$75,000 | 612 (82.7%) | 128 (17.3%) | 740 |  |  |
| $75,000 to <$100,000 | 449 (78.6%) | 122 (21.4%) | 571 |  |  |
| $100,000 to <$200,000 | 695 (79.9%) | 175 (20.1%) | 870 |  |  |
| $200,000 or more | 309 (76.1%) | 97 (23.9%) | 406 |  |  |
| *Region* |  |  |  | 21.80 (3) | < .001 |
| Northeast | 518 (83.1%) | 105 (16.9%) | 623 |  |  |
| Midwest | 590 (79.2%) | 155 (20.8%) | 745 |  |  |
| South | 1,442 (76.5%) | 442 (23.5%) | 1,884 |  |  |
| West | 844 (82.7%) | 176 (17.3%) | 1,020 |  |  |
| **Total** | 3,394 (79.4%) | 878 (20.6%) | 4,272 |  |  |

*Note.* Values represent unweighted cell counts and row percentages. Chi-square statistics test the bivariate association between each characteristic and the binary outcome (perceives climate change will harm health: Yes vs. No).

**Table A3**

*Single-Source Sensitivity Models: Each Trust Source Entered Separately, Pooled 2022–2024*

| Predictor | *B* | *SE* | *OR* | *95% CI* |
| --- | --- | --- | --- | --- |
| *Model S1. Trust in government health agencies (ref. = Not at all)* |  |  |  |  |
| A little | .78 | .22 | 2.18*** | [1.40, 3.39] |
| Some | 1.35 | .20 | 3.86*** | [2.58, 5.77] |
| A lot | 1.97 | .24 | 7.19*** | [4.50, 11.51] |
| Survey wave (2022) | .07 | .27 | 1.07 | [.63, 1.82] |
| A little × 2022 | −.17 | .32 | .84 | [.45, 1.59] |
| Some × 2022 | −.05 | .29 | .95 | [.54, 1.68] |
| A lot × 2022 | −.02 | .34 | .98 | [.50, 1.92] |
| *Model S2. Trust in scientists (ref. = Not at all)* |  |  |  |  |
| A little | −.01 | .27 | .99 | [.58, 1.69] |
| Some | .41 | .27 | 1.51 | [.88, 2.58] |
| A lot | 1.37 | .27 | 3.95*** | [2.30, 6.77] |
| Survey wave (2022) | −.64 | .35 | .53† | [.26, 1.07] |
| A little × 2022 | .48 | .41 | 1.61 | [.71, 3.63] |
| Some × 2022 | .89 | .39 | 2.45* | [1.13, 5.28] |
| A lot × 2022 | .60 | .38 | 1.82 | [.85, 3.88] |
| *Model S3. Trust in doctors (ref. = Not at all)* |  |  |  |  |
| A little | 1.27 | .67 | 3.55† | [.94, 13.40] |
| Some | 1.14 | .67 | 3.13† | [.83, 11.83] |
| A lot | 1.60 | .67 | 4.97* | [1.32, 18.77] |
| Survey wave (2022) | .59 | .79 | 1.81 | [.38, 8.74] |
| A little × 2022 | −1.27 | .87 | .28 | [.05, 1.59] |
| Some × 2022 | −.46 | .80 | .63 | [.13, 3.10] |
| A lot × 2022 | −.60 | .80 | .55 | [.11, 2.70] |

*Note.* Each model is a separate survey-weighted logistic regression (quasi-binomial) pooling the 2022 and 2024 waves, with only one trust source entered; all models adjust for sex, age, household income, race/ethnicity, education, and region (not shown). Reference category for survey wave is 2024. Cramér’s V among the three trust measures ranged from .26 to .35. *OR* = odds ratio; *CI* = confidence interval. *†p* < .10. **p* < .05. ***p* < .01. ****p* < .001.
